# Supplementary material
Source: MDPI journal article supplement (https://www.mdpi.com/1424-2818/16/6/357)
Supplement: s1 [file s1=3fversion=3d1718901580]

Figure S1. Oocyte frequency during the sample period, Santa Catalina stream, Buenos Aires Province, Argentina.

Supplementary material

Part 1

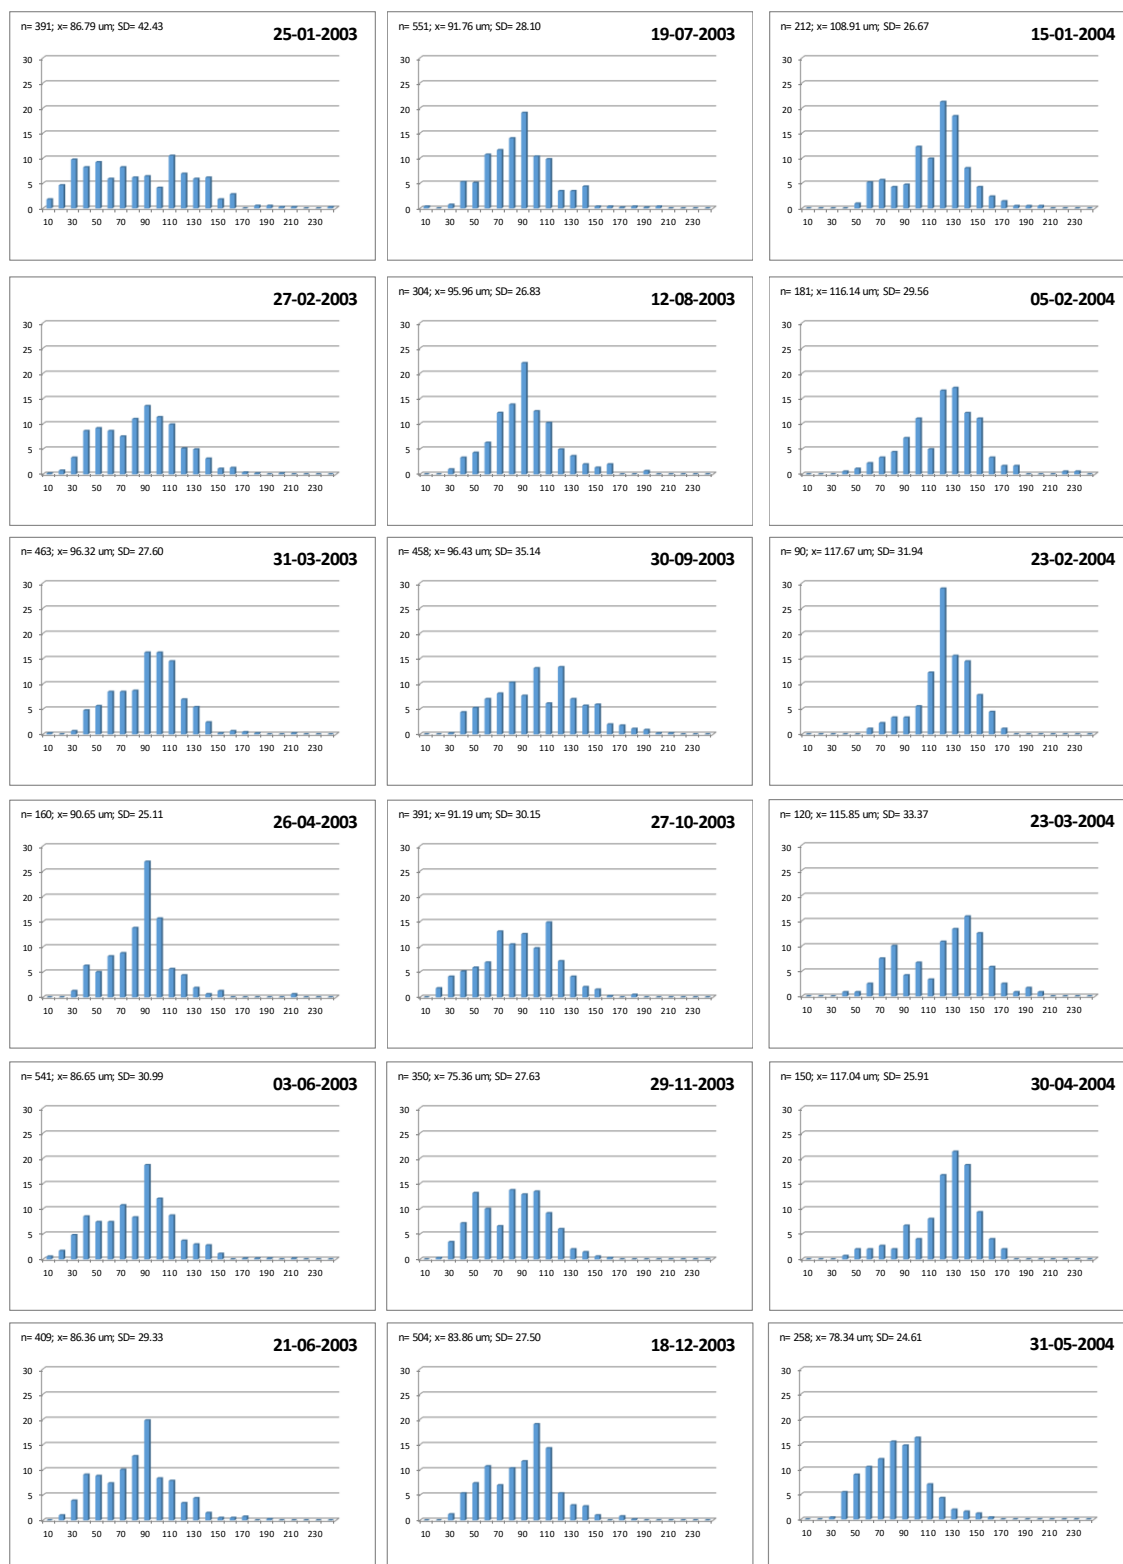

## Part 2

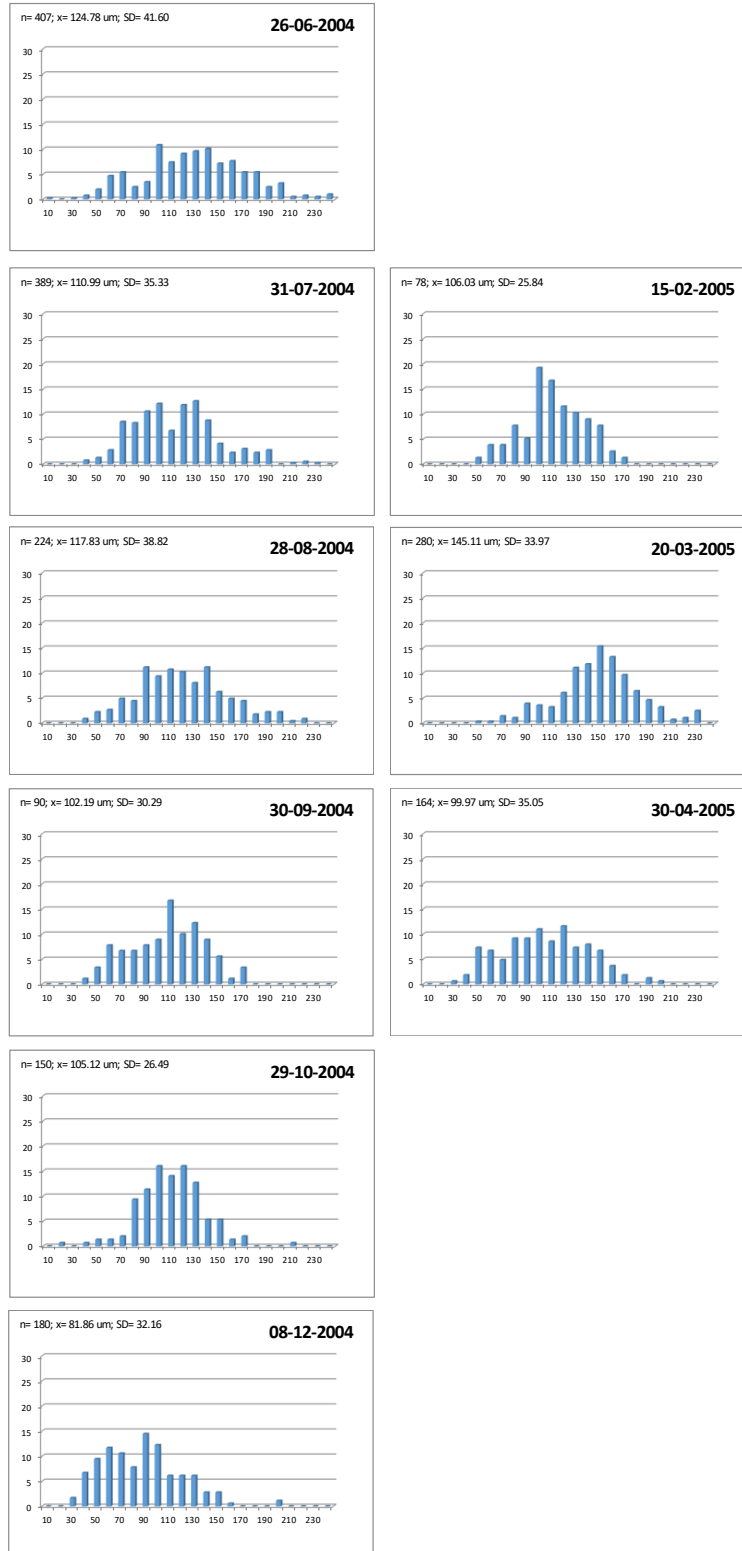

**Figure S1.** Oocyte frequency during the sample period, Santa Catalina stream, Buenos Aires Province, Argentina.
